# Supplementary material for: Dynamic Alginate Hydrogel as an Antioxidative Bioink for Bioprinting
Source: MDPI journal article supplement (doi:10.3390/gels9040312), 2023-04-07
Supplement: s1 [file s1]

# Dynamic Alginate Hydrogel as an Antioxidative Bioink for Bioprinting

Wenhai Zhang <sup>1,2</sup>, Mitchell Kuss <sup>2</sup>, Yi Yan <sup>3,\*</sup> and Wen Shi <sup>2,\*</sup>

1 First Hip Department of Orthopedics, Tianjin Hospital, Tianjin 300211, China

2 Mary & Dick Holland Regenerative Medicine Program, University of Nebraska Medical Center, Omaha, NE 68198, USA

3 Healthcare Security Office, Union Hospital, Tongji Medical College, Huazhong University of Science and Technology, Wuhan 430074, China

\* Correspondence: ezhouyanyi@163.com (Y.Y.); donatellowenshi@gmail.com (W.S.)

Table S1: Primer sequence for the RT-PCR study.

| Gene   | Genbank ID  | Forward sequence           | Reverse sequence        | Product size |
|--------|-------------|----------------------------|-------------------------|--------------|
| Acan   | NM_007424.3 | TCACTGTTACCGCCACTTTCC      | TGCTGCTCAGATGTGACTGC    | 86           |
| Col2a1 | NM_031163.3 | CGAGTGGAAGAGCGGAGACTAC     | CCAGTTTTTCCGAGGGACAGT   | 136          |
| Mmp13  | NM_008607.2 | GGTTATGACATTCTGGAAGGTTATCC | CGTGGTTCTCAGAGAAGAAGAGG | 130          |
| Actb   | NM_007393.5 | AAATCGTGCGTGACATCAAAGA     | GCCATCTCCTGCTCGAAGTC    | 64           |

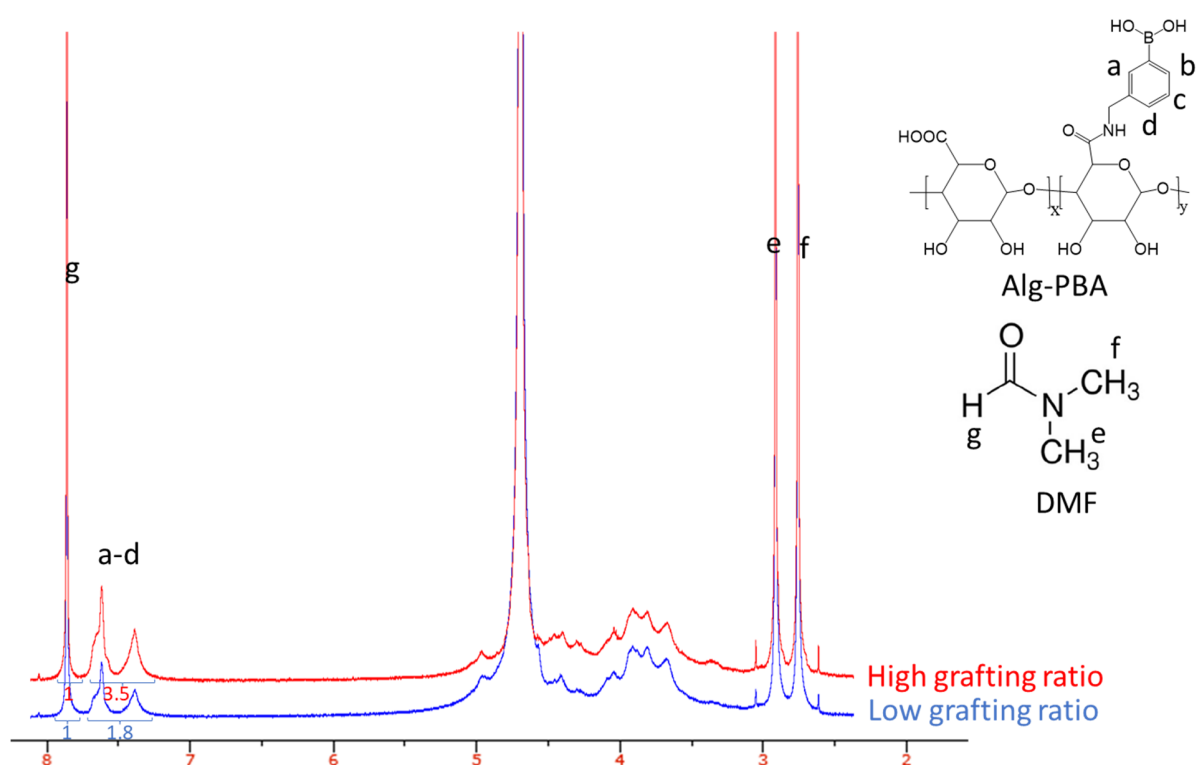

Figure S1: The grafting ratio of PBA in alginate can be determined by  $^1\text{H}$  NMR in  $\text{D}_2\text{O}$  with the addition of 25 mM DMF.

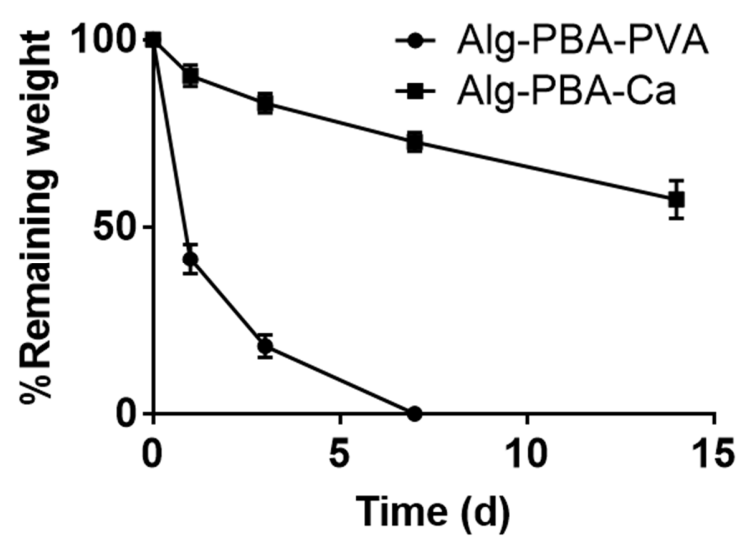

Figure S2. Stability of Alg-PBA hydrogel before and after calcium crosslinking in the cell culture medium.

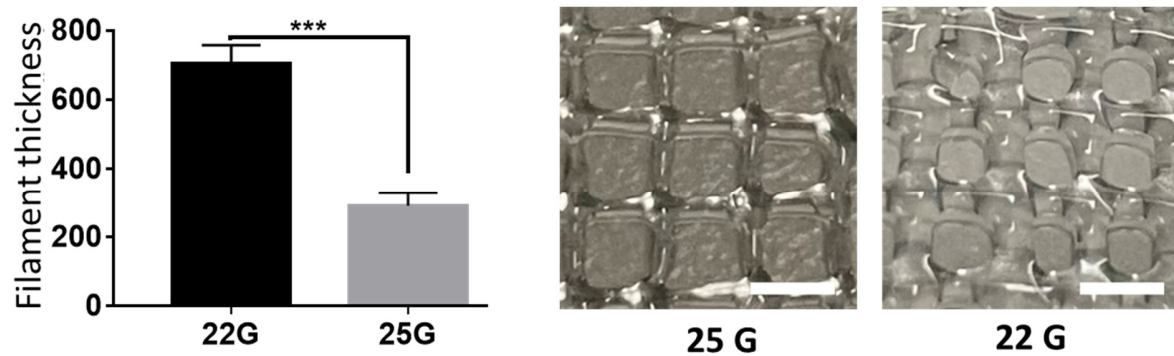

Figure S3. Influence of printing nozzle diameter on the filament thickness of the printed grid scaffold. Scale bar 2.5 mm. \*\*\*  $p < 0.001$ .
